# Supplementary material for: 1 : 1 and 2 : 1 co-crystals of alkoxystilbazoles with tetrafluoroiodobenzenes: halogen bonding, a rare Carene–H⋯N hydrogen bond and unsymmetric iodine⋯pyridine interactions
Source: Royal Society of Chemistry journal article supplement (doi:10.1039/c3ce41454j), 2013-01-01
Supplement: c3ce41454j.pdf [file c3ce41454j.pdf]

**1 : 1 and 2 : 1 Co-Crystals of Alkoxystilbazoles with  
Tetrafluoroiodobenzenes: Halogen Bonding, a Rare C<sub>arene</sub>–H...N  
Hydrogen Bond and Unsymmetric Iodine...Pyridine Interactions**

**Carsten Präsang, Linda J. McAllister, Adrian C. Whitwood and Duncan W. Bruce\***

Department of Chemistry  
University of York  
Heslington  
YORK YO10 5DD (UK)  
Tel: (+44) 1904 324085  
E-mail: [duncan.bruce@york.ac.uk](mailto:duncan.bruce@york.ac.uk)

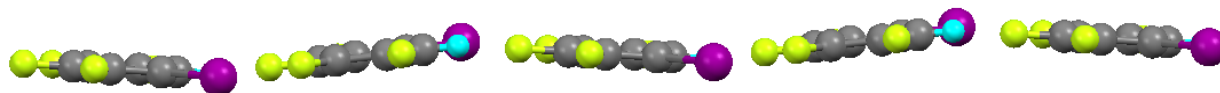

Figure S1 Alternating motif in a side-on view of the 2,3,4,5-tetrafluoriodobenzene rings in **1**.

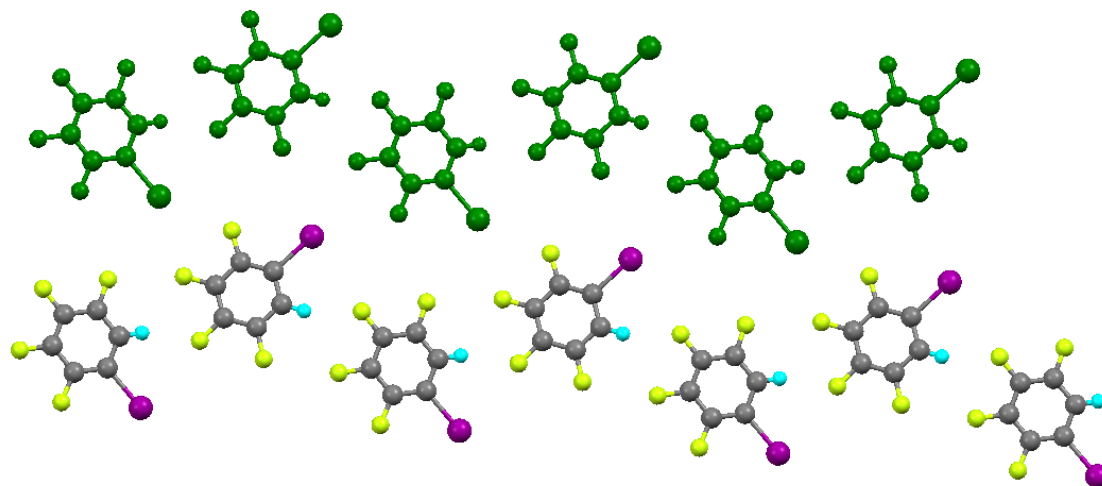

Figure S2 Upper (coloured green) and lower layer (normal elemental colours) of 2,3,4,5-tetrafluoriodobenzene chains in successive layers of the structure in **1**.

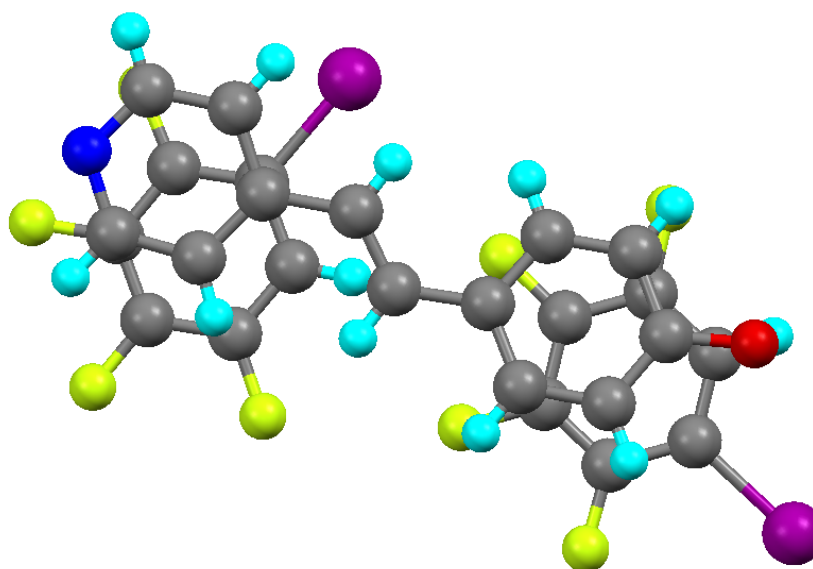

Figure S3 Overlay of the stilbazole with two molecules of 2,3,4,5-tetrafluoriodobenzene in **1**.

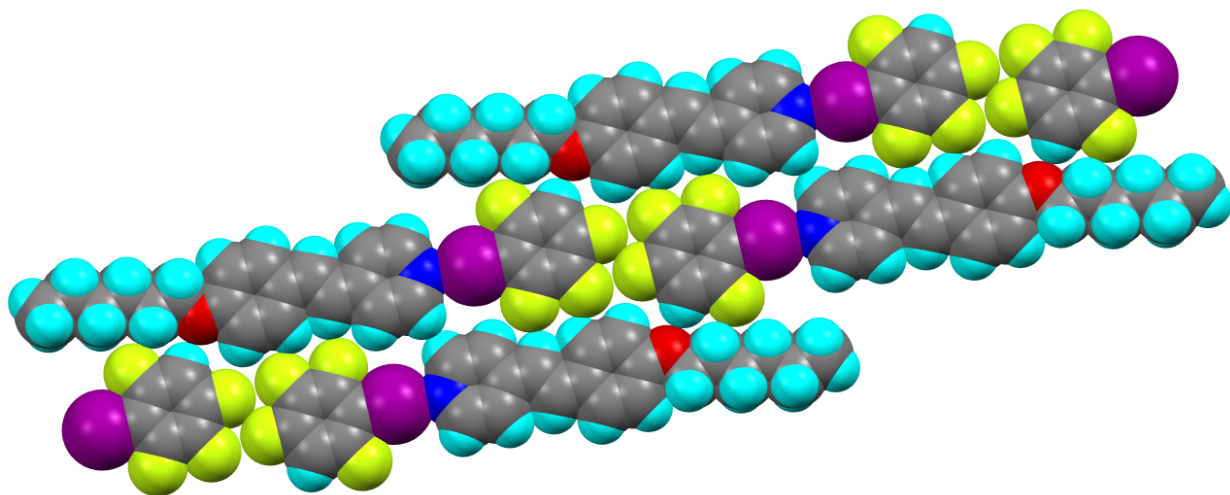

Figure S4 Space-filling model of complex **2** showing the back-to-back arrangement of the fluoroarenes.

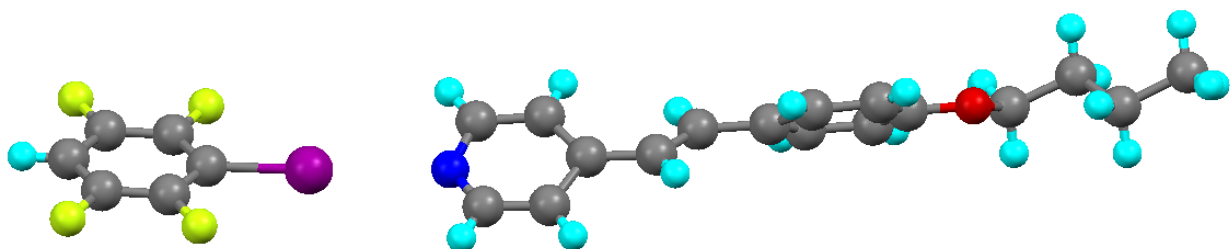

Figure S5 Halogen-bonded complex **3** showing the equal-probability twisted conformer of the stilbazole.

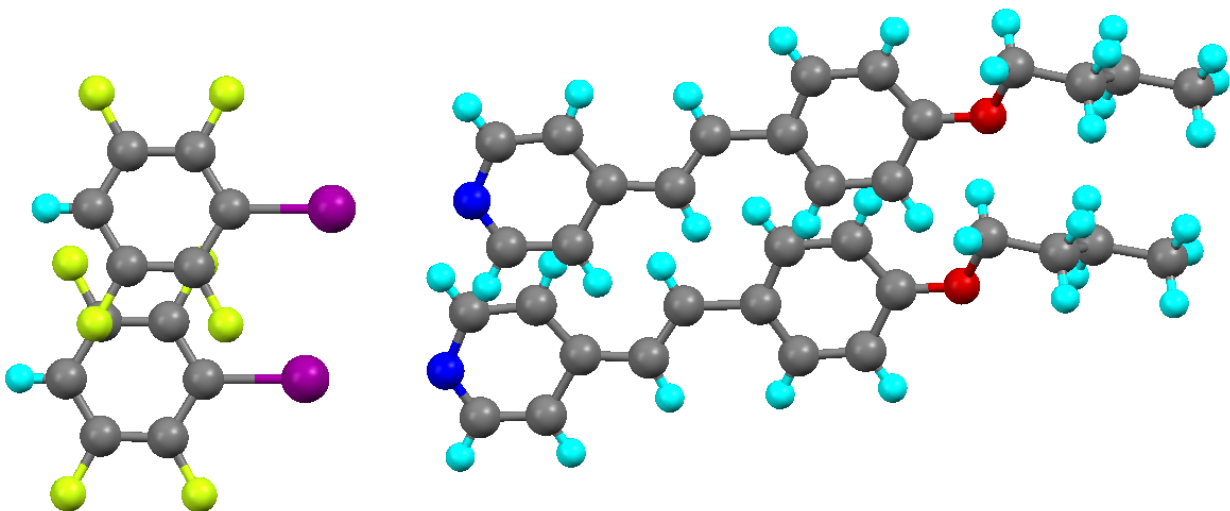

Figure S6 Complex **3** showing the absence of intermolecular overlap in the stacking direction.

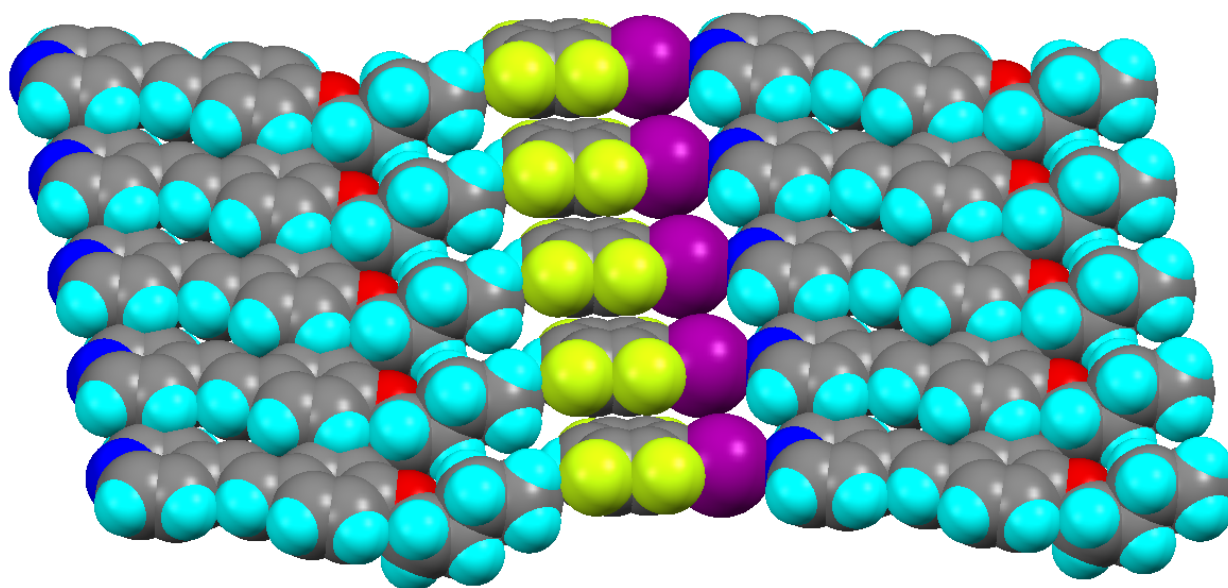

Figure S7 Space-filling model of the packing in complex **3** showing how approach of the alkoxy chain of the stilbazole to the fluoroarene is moderated by a steric interaction.

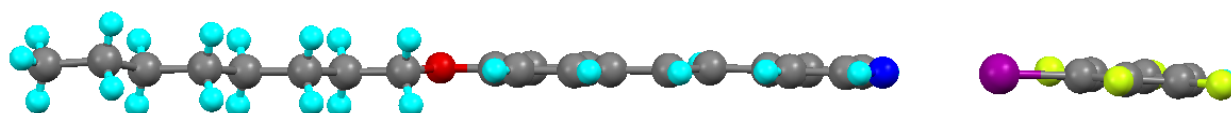

Fig. S8 Side view of of complex **4**.

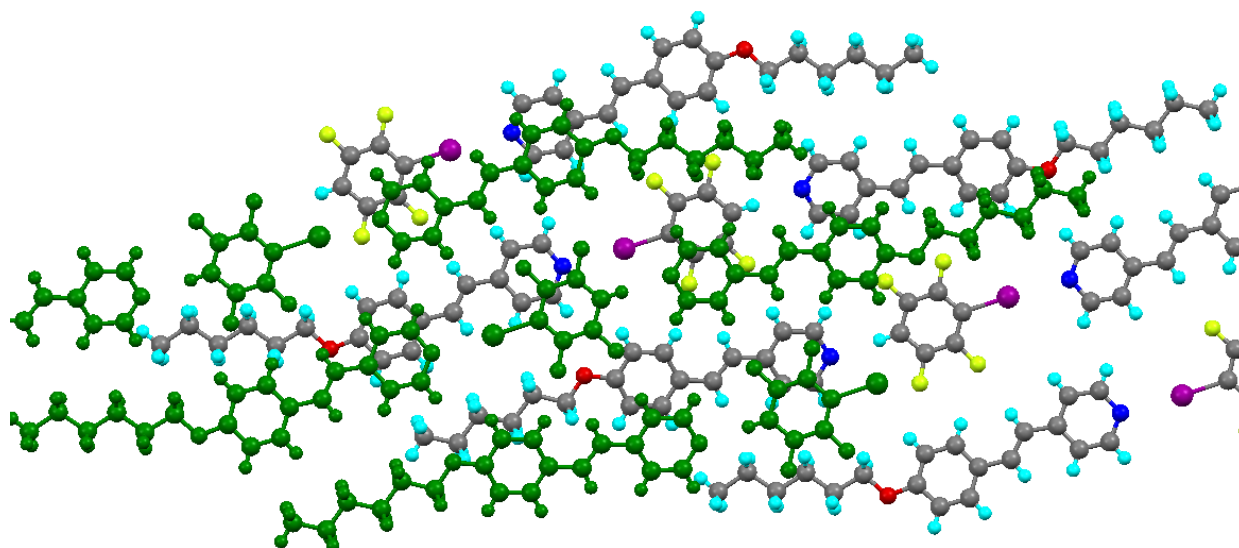

Fig. S9 Looking down on the superposition of two layers of complex **6**.

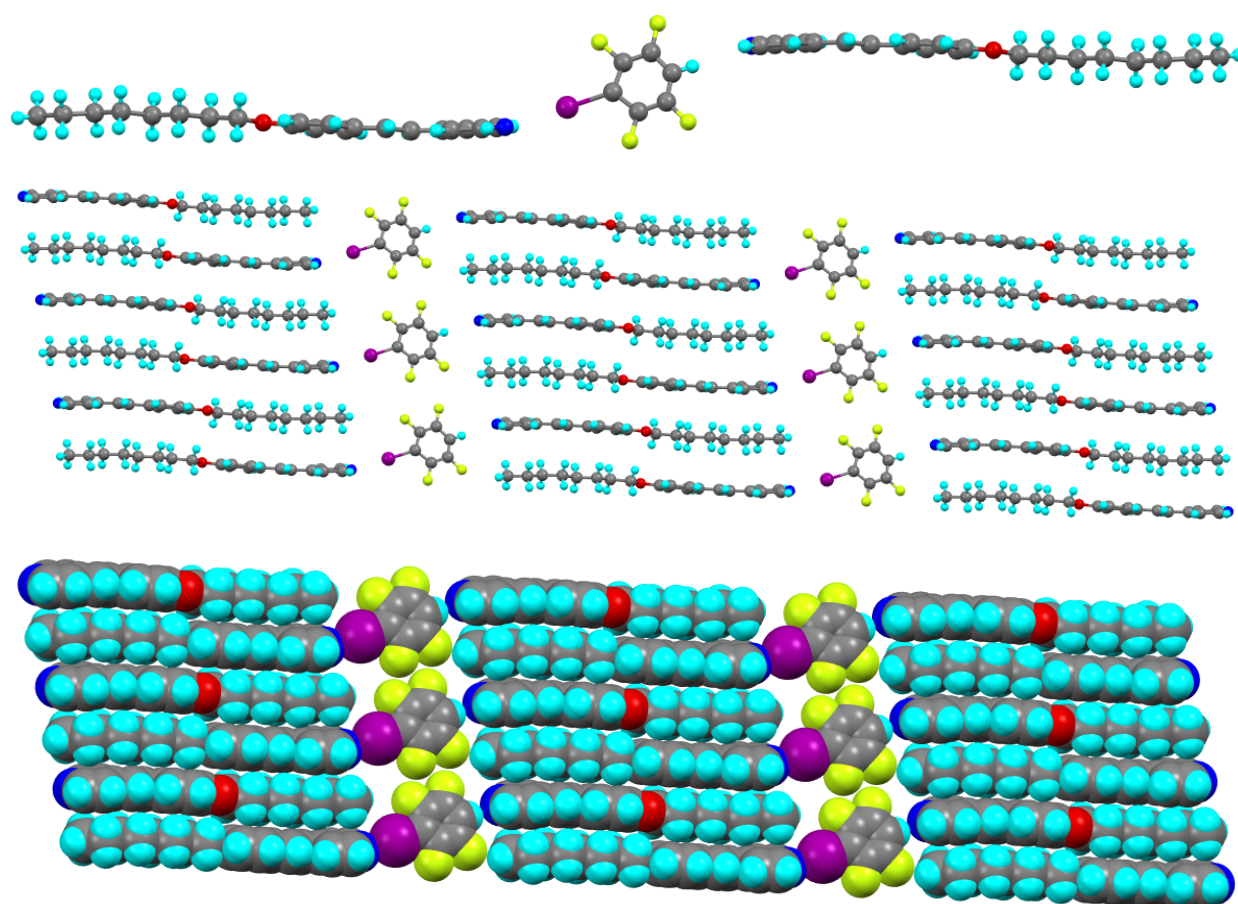

Figure S10 Diagrams to show the arrangement in complex **7** (recall that in reality the tetrafluoroarene ring is disordered so that it is not clear which is the iodine and which the hydrogen end.
